# Supplementary material
Source: PubMed Central journal article supplement (PMC7558415)
Supplement: NIHMS1626864-supplement-1.pdf [file NIHMS1626864-supplement-1.pdf]

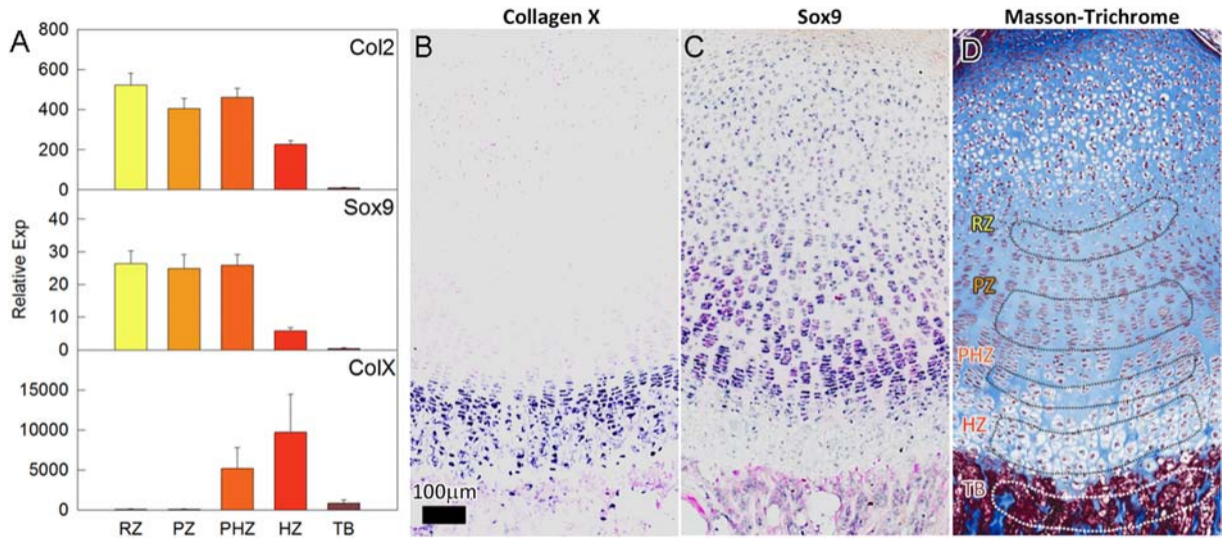

Figure S1

1wk

4wk

Col2-cre WT

Col2-cre Sox9GFP

Col2-cre WT

Col2-cre Sox9GFP

in situ - Collagen X

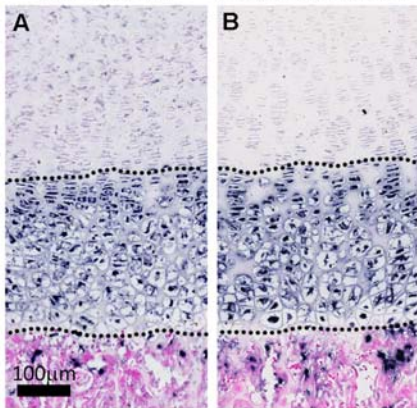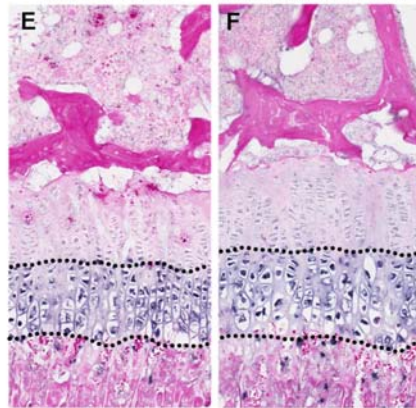

Mason-Trochrome Staining

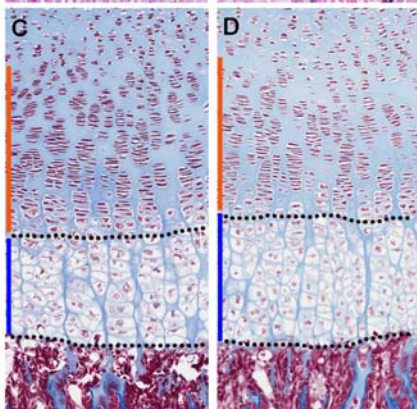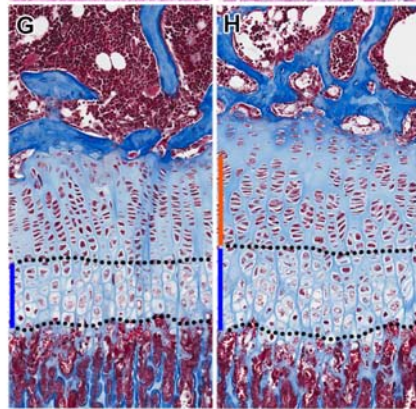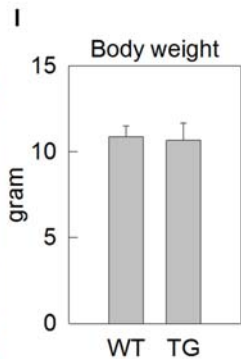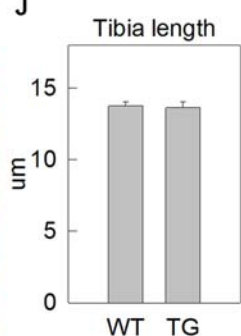

Figure S2

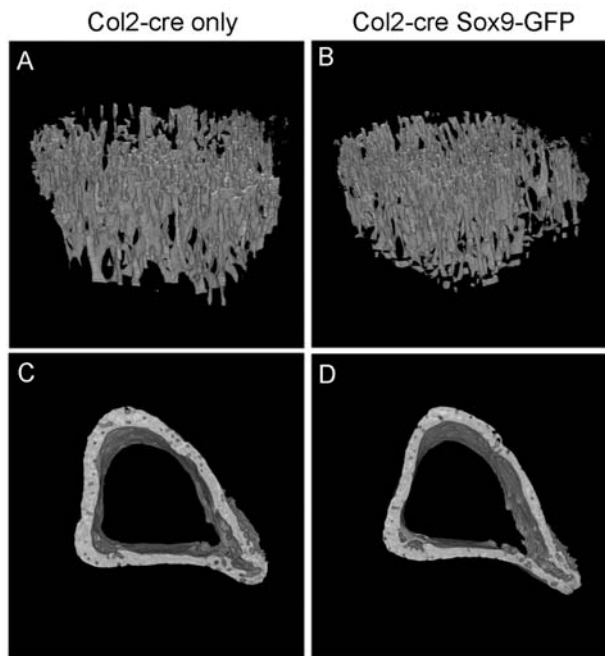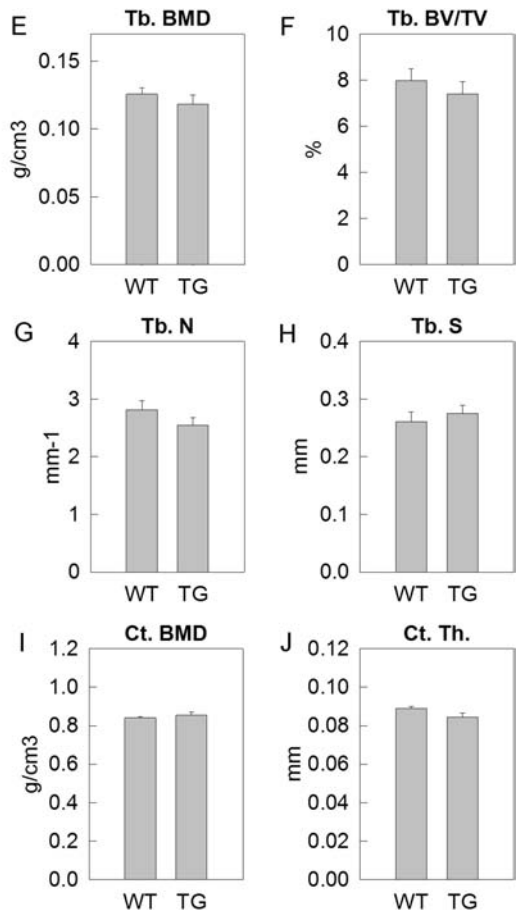

Figure S3

## Supplemental Figures

### **Figure S1 Sox9 expression decreases in the hypertrophic zone of the murine growth plate.**

(A) Laser capture microdissection (LCM) followed by qPCR showed changes in Col2, Sox9, and ColX gene expression (normalized to 18S RNA) across the different zones (RZ, resting zone; PZ, proliferative zone; PHZ, prehypertrophic zone; HZ, hypertrophic zone) of 1 wk old murine growth plates and in the adjacent trabecular bone (TB). Sox9 expression decreased dramatically in the hypertrophic zone, and continued to decrease in the trabecular bone. (Number of animals, N=5) (B-C) In situ hybridization of Collagen X (B) and Sox9 (C) provides validation of the qPCR results. (D) Masson-Trichrome-stained 1-wk old murine growth plate section, used to illustrate the areas typically dissected out by LCM for analysis. Scale bar, 100  $\mu$ m.

**Figure S2. Growth plates from transgenic SOX9 mice showed slight expansion of hypertrophic zone but no effect on overall bone growth.** In situ hybridization for collagen X (A,B, for 1-wk; E,F, for 4-wk), indicative of hypertrophic differentiation, showed that Col2-cre SOX9 transgenic mice have only slightly expanded areas of collagen X-expressing hypertrophic cells in both 1- and 4-wk tibial growth plates compared with Col2-cre only littermates. Masson-Trichrome-stained sections (C,D, for 1-wk; G,H, for 4-wk), showed that growth plates from Col2-cre SOX9 transgenic mice were histologically similar to Col2-cre-only littermates. Vertical bars: orange, proliferative zone; blue, hypertrophic zone. Scale bar, 100  $\mu$ m. Body weights (I) and tibia lengths (J) were compared between Col2-cre SOX9 transgenic mice and Col2-cre only littermates at 4-wk and showed no significant difference.

### **Figure S3. Transgenic SOX9 mice showed no significant difference in bone structure. (A-D)**

3D rendering images of  $\mu$ CT of tibia from 4-wk old Col2-cre SOX9 transgenic mice and Col2-cre only littermates showed similar trabecular structure and cortical thickness. (E-J) Quantitative measurements of trabecular and cortical bone with  $\mu$ CT similarly showed that the tibial structure between Col2-cre SOX9 transgenic mice and Col2-cre only littermates at 4-wk were not statistically significantly different (N=7). Tb. BMD, trabecular bone mineral density; Tb. BV/TV, trabecular bone volume per tissue volume; Tb. N, trabecular number; Tb. S, trabecular spacing; Ct. BMD, cortical bone mineral density; Ct. Th, cortical thickness.
